# Supplementary material
Source: Research Square preprint supplement (doi:10.21203/rs.3.rs-9722732/v1)
Supplement: Supplementary file 1 [file 74c86e0adf1a8eca9f1e4cec.docx]

**Table S1 Chemical compositions and heavy metal contents of the main raw materials and the prepared PGF**

| **Parameter** | | **Phosphogypsum** | **Biomass ash** | **Dolomite** | **Biochar** | **Potassium sulfate** | **PGF** | **National standard** | |
| --- | --- | --- | --- | --- | --- | --- | --- | --- | --- |
| **Type I** | **Type II** |
| SiO₂ | (%) | 7.51±0.12 | 48.5±0.35 | 0.91±0.03 | 0.12±0.01 | N.D. | 11.3±0.04 | 9.0 | 6.0 |
| CaO | 35.3±0.25 | 24.1±0.21 | 28.2±0.22 | 0.12±0.01 | N.D. | 35.24±0.01 | 20 | 14 |
| K₂O | 0.53±0.02 | 5.86±0.11 | N.D. | 0.91±0.03 | 80.5±0.42 | 3.63±0.02 | 3.0 | 3.0 |
| MgO | 0.07±0.01 | 0.51±0.02 | 18.9±0.18 | 0.09±0.01 | N.D. | 2.80±0.01 | 2.0 | 2.0 |
| Cd | (mg·kg−1) | 0.10±0.01 | 10.5±0.31 | N.D. | N.D. | N.D. | 1.52±0.08 | 50 | |
| Pb | 5.30±0.21 | 121±3.5 | N.D. | N.D. | N.D. | 24.23±1.21 | 10 | |
| As | 5.41±0.24 | N.D. | N.D. | N.D. | N.D. | 3.21±0.26 | 200 | |
| Cr | 14.0±0.5 | 175±4.2 | N.D. | N.D. | N.D. | 34.89±1.74 | 500 | |
| Hg | 0.12±0.01 | 0.81±0.04 | N.D. | N.D. | N.D. | 0.89±0.13 | 5.0 | |

Note: PGF refers to the Si-Ca-K-Mg fertilizer prepared from phosphogypsum, biomass ash, dolomite, biochar, and potassium sulfate. N.D. indicates below the instrumental detection limit. The national standard limits are based on the requirements for Type I and Type II fertilizers in the Chinese National Standard (GB/T 36207-2018).

**Table S2 Factors and levels of the orthogonal experiment**

| **Level** | **Calcination temperature (°C)** | **Calcination time (min)** | **Material mass ratio**  **(Phosphogypsum:biomass ash:potassium sulfate:dolomite:biochar)** |
| --- | --- | --- | --- |
| 1 | 750 | 45 | 62:15:4:14:5 |
| 2 | 850 | 60 | 67:12:4:12:5 |
| 3 | 950 | 90 | 72:9:4:10:5 |

**Table S3 Design matrix and analytical results of the orthogonal experiment**

| **Trial** | **Calcination temperature** | **Calcination time** | **Material mass ratio** | **SiO2**  **(%)** | **CaO**  **(%)** | **K2O**  **(%)** | **MgO**  **(%)** |
| --- | --- | --- | --- | --- | --- | --- | --- |
| 1 | 1 | 3 | 2 | 6.50 | 27.57 | 3.52 | 2.01 |
| 2 | 1 | 1 | 1 | 6.87 | 30.93 | 3.27 | 2.77 |
| 3 | 1 | 2 | 3 | 7.48 | 30.42 | 3.44 | 2.48 |
| 4 | 2 | 3 | 3 | 9.49 | 31.98 | 2.99 | 2.26 |
| 5 | 2 | 2 | 2 | 10.08 | 31.37 | 3.58 | 2.32 |
| 6 | 2 | 1 | 1 | 11.30 | 35.25 | 3.67 | 2.80 |
| 7 | 3 | 1 | 2 | 12.61 | 27.94 | 3.56 | 2.68 |
| 8 | 3 | 3 | 3 | 14.03 | 27.49 | 3.39 | 2.14 |
| 9 | 3 | 2 | 1 | 14.82 | 33.95 | 3.26 | 2.79 |

**Table S4 Range analysis results of the orthogonal experiment**

| **Response variable** | **Analytical parameter** | **Calcination temperature** | **Calcination time** | **Material mass ratio** |
| --- | --- | --- | --- | --- |
| SiO2  (%) | *k1* | 6.95 | 10.26 | 11.00 |
| *k2* | 10.29 | 10.79 | 9.73 |
| *k3* | 13.82 | 10.01 | 10.34 |
| Range (*R*) | 6.87 | 0.78 | 1.27 |
| CaO  (%) | *k1* | 29.64 | 31.37 | 33.38 |
| *k2* | 32.87 | 31.91 | 28.96 |
| *k3* | 29.79 | 29.01 | 29.96 |
| Range (*R*) | 3.23 | 2.90 | 4.42 |
| K2O  (%) | *k1* | 3.41 | 3.50 | 3.40 |
| *k2* | 3.41 | 3.43 | 3.55 |
| *k3* | 3.40 | 3.30 | 3.27 |
| Range (*R*) | 0.01 | 0.20 | 0.28 |
| MgO  (%) | *k1* | 2.42 | 2.75 | 2.79 |
| *k2* | 2.46 | 2.53 | 2.34 |
| *k3* | 2.54 | 2.14 | 2.29 |
| Range (*R*) | 0.12 | 0.62 | 0.50 |
